# Supplementary material for: Molecular mechanism of HIV-1 TAT peptide and its conjugated gold nanoparticles translocating across lipid membranes
Source: Royal Society of Chemistry journal article supplement (doi:10.1039/c9cp01543d), 2019-01-01
Supplement: c9cp01543d1.pdf [file c9cp01543d1.pdf]

## Electronic supplementary information for

### Molecular mechanism of HIV-1 TAT peptides and conjugated gold nanoparticles translocating across lipid membranes

Xuebo Quan<sup>a</sup>, Delin Sun<sup>ab</sup> and Jian Zhou<sup>\*a</sup>

<sup>a</sup> School of Chemistry and Chemical Engineering, Guangdong Provincial Key Lab for Green Chemical Product Technology, South China University of Technology, Guangzhou 510640, P. R. China

E-mail: [jianzhou@scut.edu.cn](mailto:jianzhou@scut.edu.cn)

<sup>b</sup> Biosciences and Biotechnology Division, Physical and Life Sciences Directorate, Lawrence Livermore National Laboratory, Livermore, CA 94550

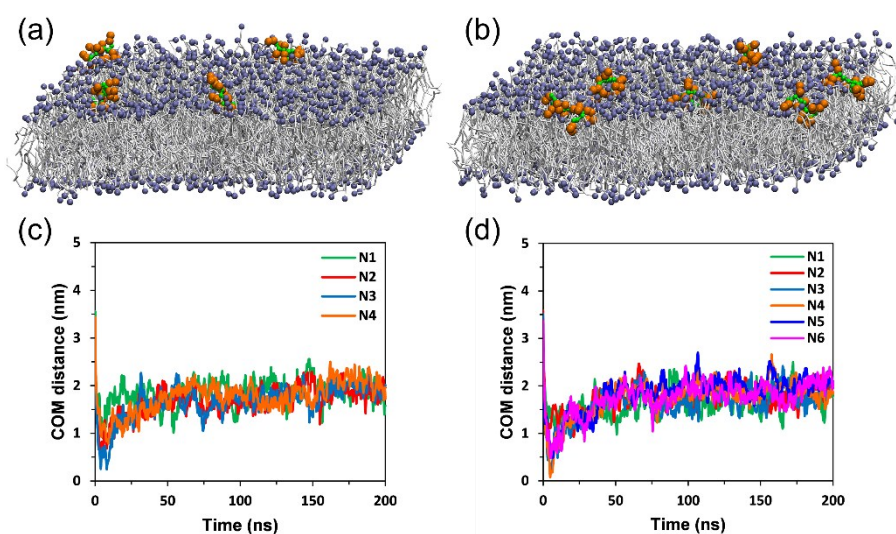

**Fig. S1.** (a) The final simulation snapshot of 4 TAT peptides interacting with the lipid membrane, (b) the final simulation snapshot of 6 TAT peptides interacting with the lipid membrane, (c) the COM distance in the z direction between TAT peptides and the lipid membrane when N=4, (d) the COM distance in the z direction between TAT peptides and the lipid membrane when N=6.

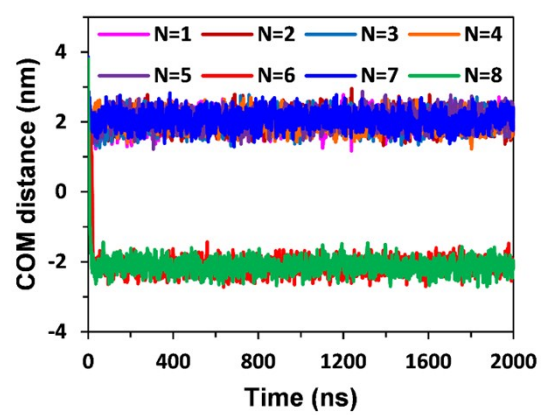

**Fig. S2.** COM distances in the z direction between each TAT peptide and the lipid membrane (N=8).
